# Supplementary material for: Novel naphthyridine-based compounds in small molecular non-doped OLEDs: synthesis, properties and their versatile applications for organic light-emitting diodes
Source: Royal Society of Chemistry journal article supplement (doi:10.1039/c2nj40279c), 2012-01-01
Supplement: c2nj40279c.pdf [file c2nj40279c.pdf]

# **Novel naphthyridine-based compounds in small molecular non-doped OLEDs: synthesis, properties and their versatile applications for organic light-emitting diodes**

A Fernández-Mato, J M Quintela\* and C Peinador\*

*Departamento de Química Fundamental, Facultad de Ciencias, Universidad da Coruña. Campus A Zapateira, 15008, A Coruña, Spain.*

Tel: (+34) 981167000, Fax: (+34) 981167065

carlos.peinador@udc.es, jose.maria.quintela@udc.es

**Electronic Supplementary Material**

# 11\_09506\_UAE\_A\_327

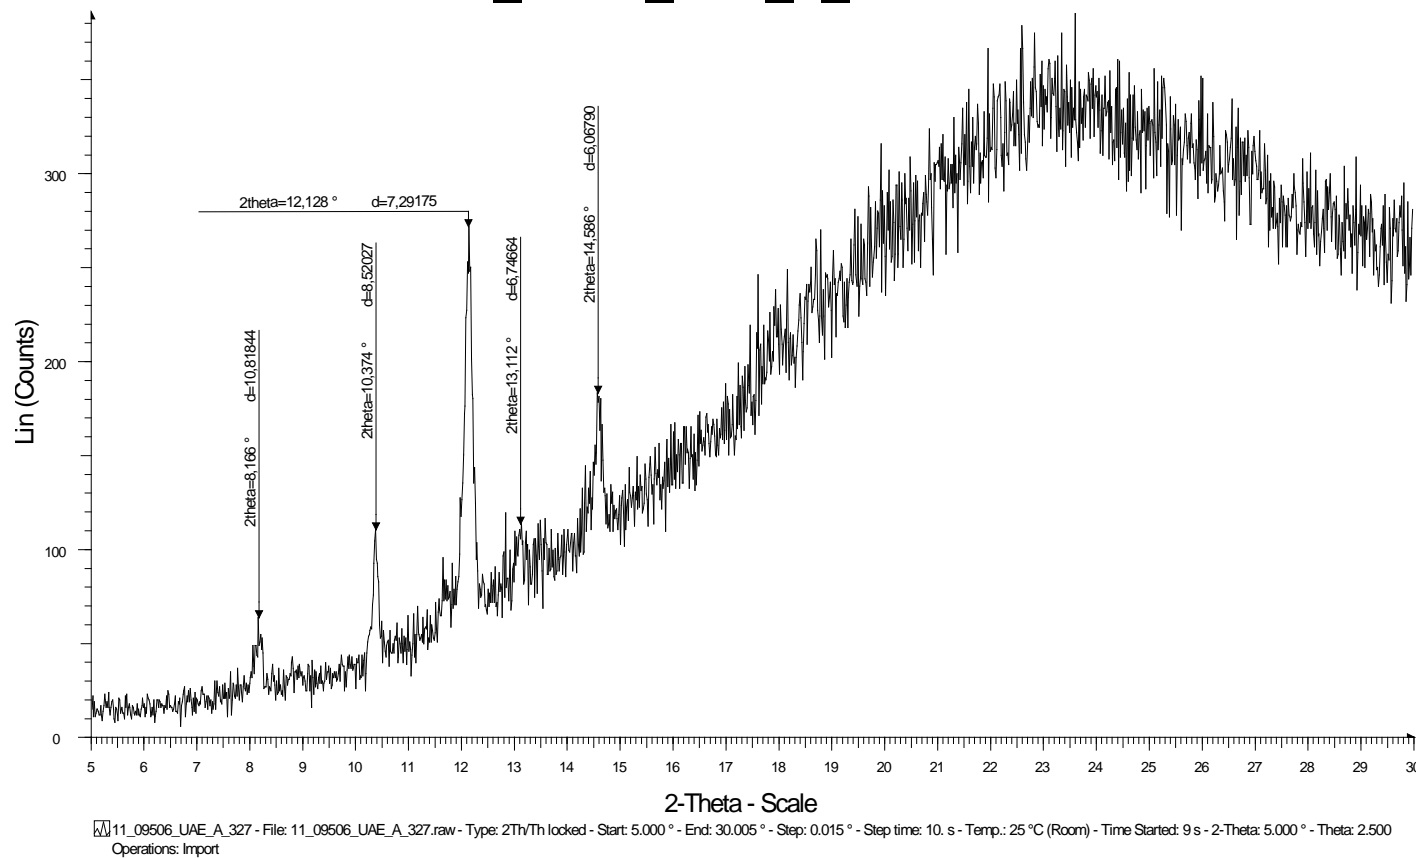

Powder X-ray diffraction patterns of compound **3** in film, obtained by evaporation in acetone.

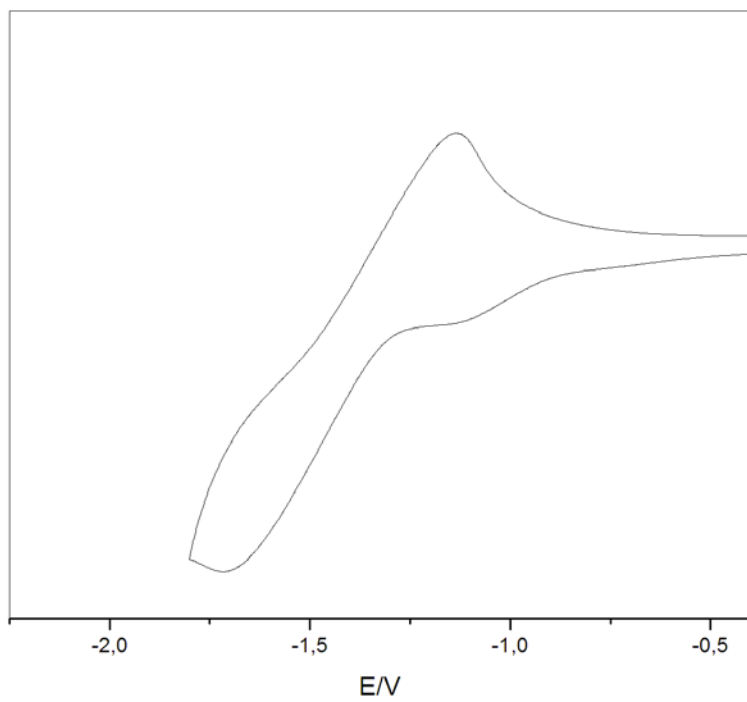

Cyclic voltammogram of **6** measured in acetonitrile-TBAPF<sub>6</sub>.

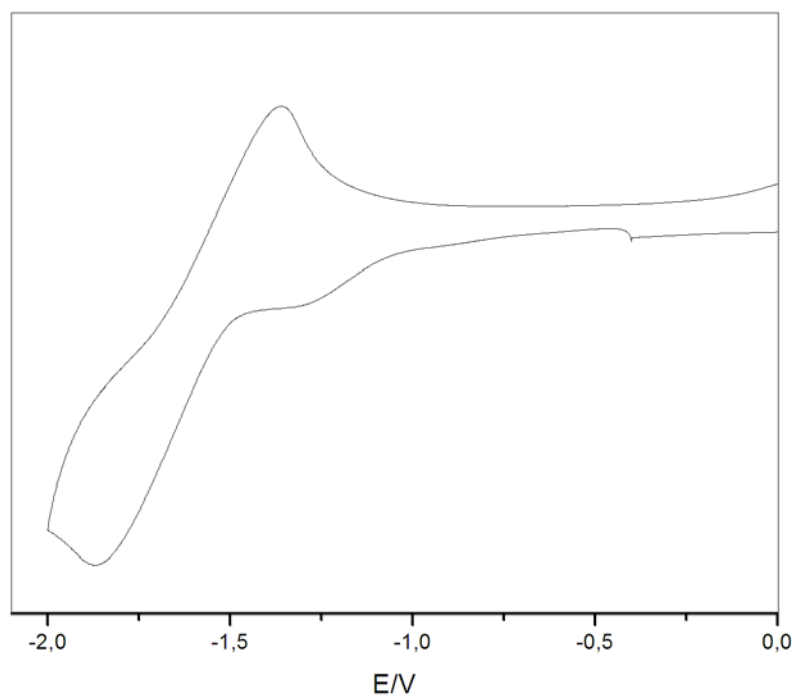

Cyclic voltammogram of **3** measured in acetonitrile-TBAPF<sub>6</sub>.

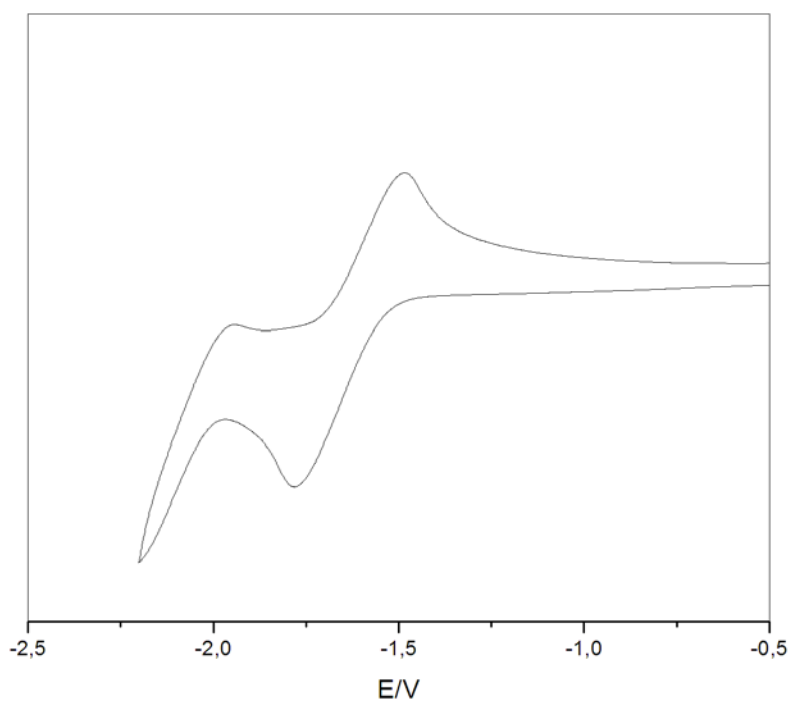

Cyclic voltammogram of **4** measured in acetonitrile-TBAPF<sub>6</sub>.

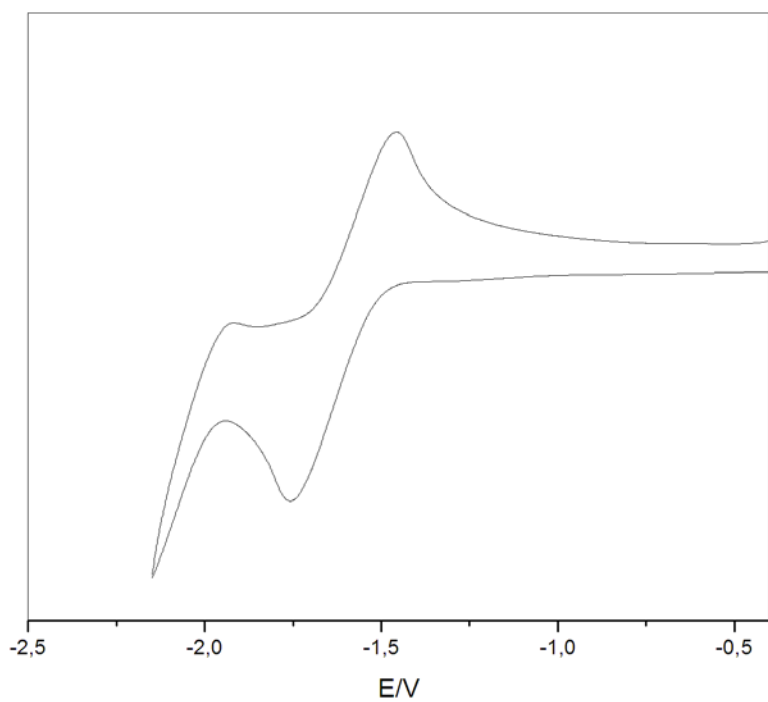

Cyclic voltammogram of **2** measured in acetonitrile-TBAPF<sub>6</sub>.

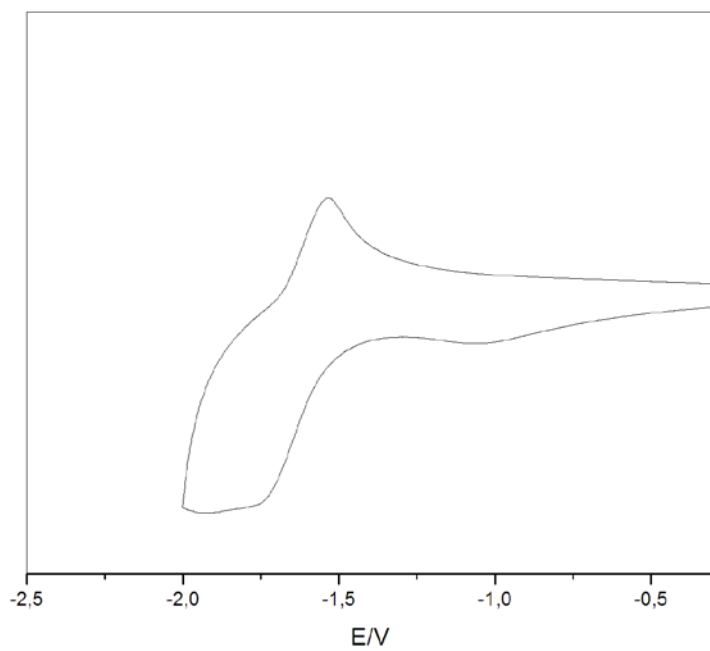

Cyclic voltammogram of **1** measured in acetonitrile-TBAPF<sub>6</sub>.

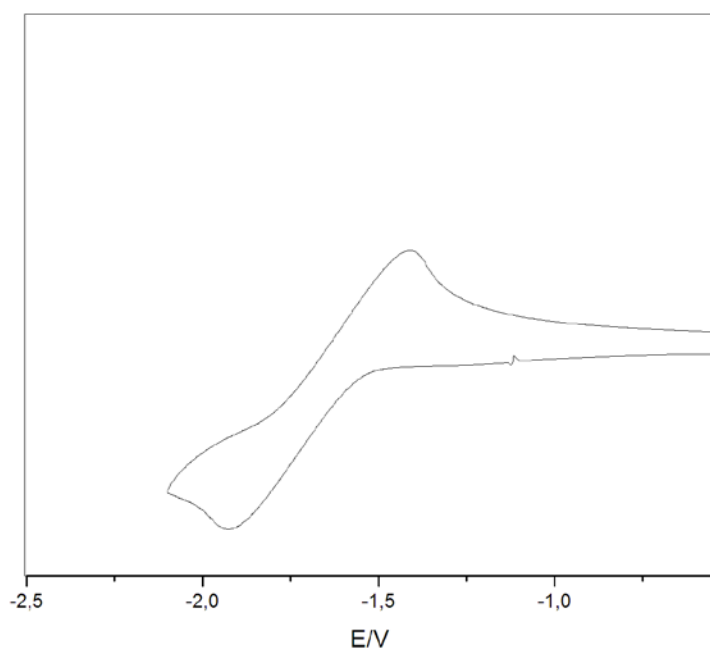

Cyclic voltammogram of **5** measured in acetonitrile-TBAPF<sub>6</sub>.

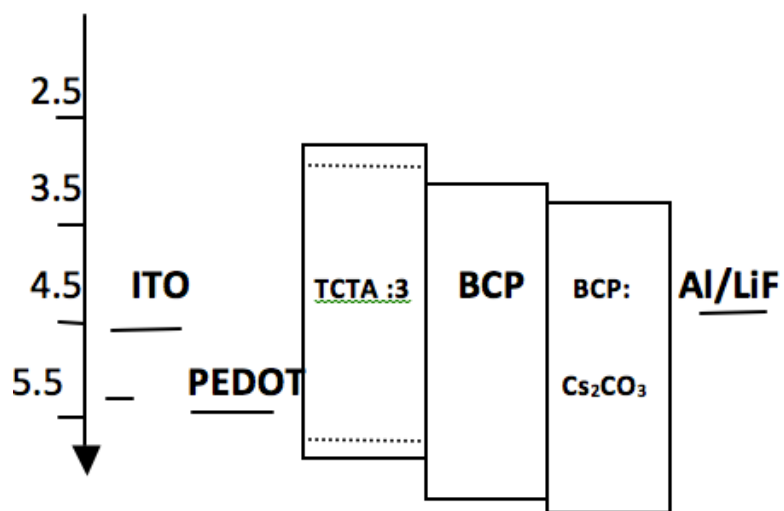

**Energy-level diagram of the device A**

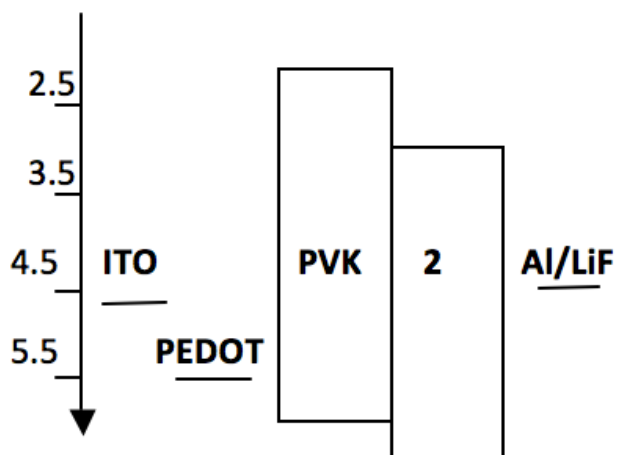

**Energy-level diagram of the device B**

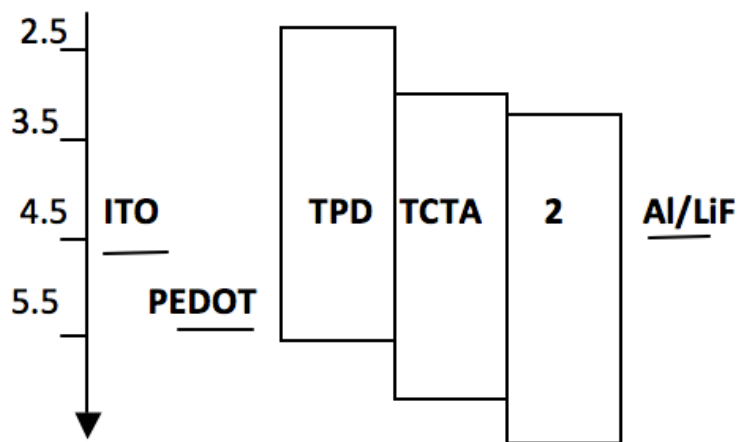

**Energy-level diagram of the device C**
